# Supplementary material
Source: PubMed Central journal article supplement (PMC8655367)
Supplement: NIHMS1756983-supplement-1.pdf [file NIHMS1756983-supplement-1.pdf]

1 **Supplemental information**

2

3 **Creating plugins for this program.**

4 1. Go to “C drive | Program Files | ImageJ | plugins” and create folder titled “SWIFT\_Choroid”.

5

6 2. Copy “Steps 1” and “Step 2” which are provided into this newly created folder.

7

8 3. Restart Image J and click “Plugins | SWIFT\_Choroid | Step 1, Step 2”.

9

10 **Creating shortcuts for this program.**

11 1. To create shortcuts for these steps, go to “Plugins | Shortcuts | Add Shortcut | Shortcut”.

12 Type out the shortcut key to use (i.e., “F1”) | Command: “Step1”.

13

14 NOTE: Make sure to have a shortcut key available. If all of shortcuts keys are already assigned,  
15 then one needs to first remove a shortcut using “Plugins | Shortcuts | Remove” a shortcut  
16 before using that key for Swift\_Choroid.

17

18 2. Quit ImageJ after creating shortcuts; the new function will not work or show up as an option  
19 in the menu until doing so.

20
